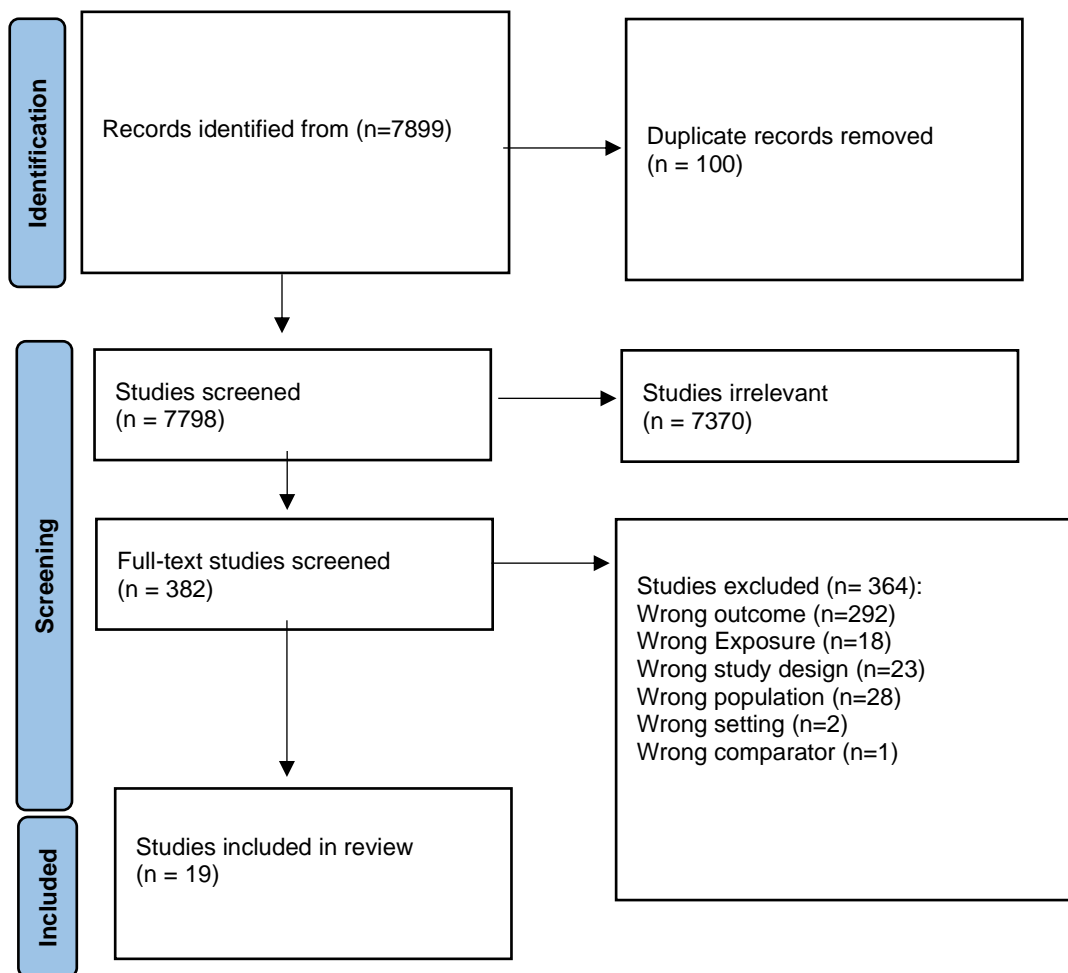

**Figure 1. Flow diagram**

From: Page MJ, McKenzie JE, Bossuyt PM, Boutron I, Hoffmann TC, Mulrow CD, et al. The PRISMA 2020 statement: an updated guideline for reporting systematic reviews. *BMJ* 2021;372:n71. doi: 10.1136/bmj.n71. For more information, visit: <http://www.prisma-statement.org/>

Figure 2: Pre-Eclampsia

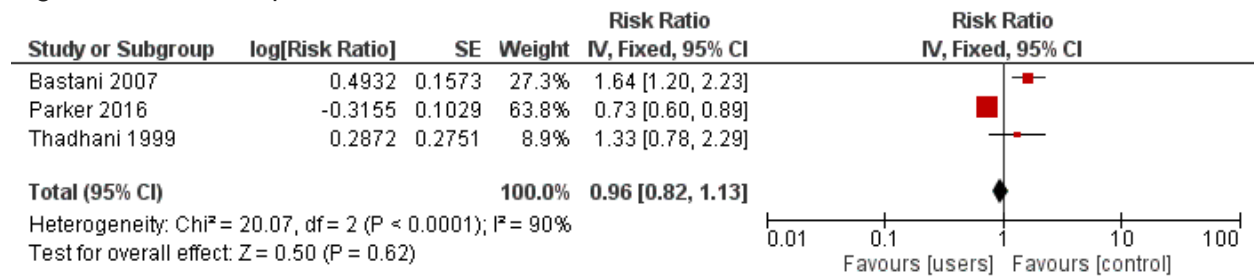

Figure 3: High-Risk Pregnancy and Birth

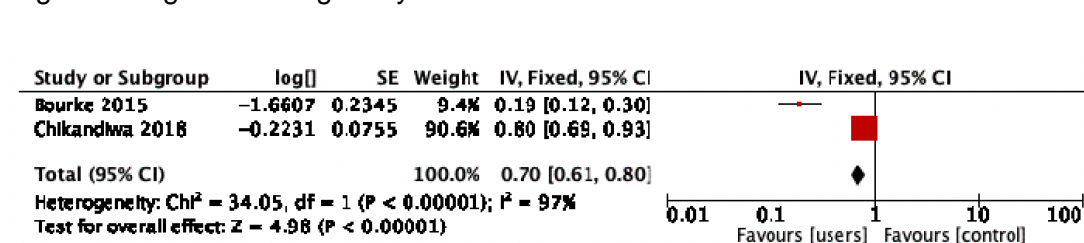

Figure 4: Pregnancy-Related Venous Thromboembolism

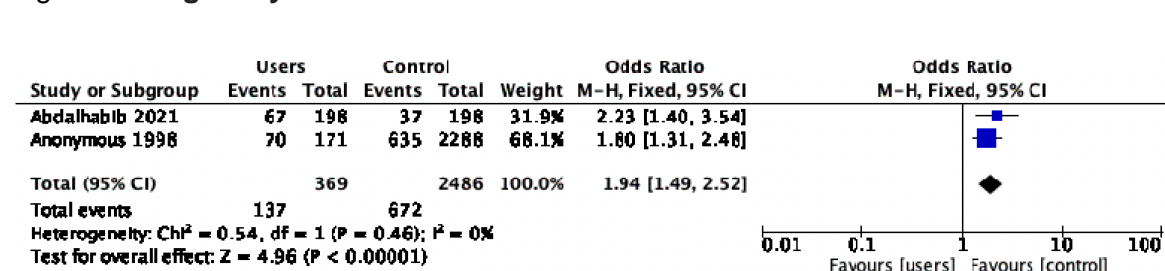

Figure 5: Ectopic Pregnancy

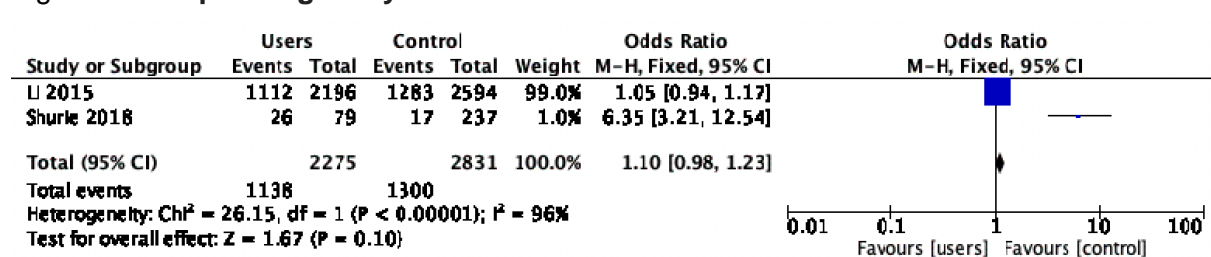

Source: https://storage.googleapis.com/plos-corpus-prod/10.1371/journal.pone.0294475/1/pone.0294475.s006.pdf
